# Supplementary material for: Manipulating replisome dynamics to enhance lambda Red-mediated multiplex genome engineering
Source: PubMed Central journal article supplement — Nucleic Acids Res. 2012 Aug 13;40(22):e170. doi: 10.1093/nar/gks751 (PMC3526312; doi:10.1093/nar/gks751), 2012-08-13
Supplement: supp_gks751_nar-01176-met-k-2012-File007.pdf [file supp_gks751_nar-01176-met-k-2012-File007.pdf]

## Supplemental Information

Table S1 DNA Oligonucleotides used in this study.

An asterisk (\*) indicates use of a phosphorothioate bond to protect against exonuclease activity (1).

| Name | Used for  | Sequence                                                                                           |
|------|-----------|----------------------------------------------------------------------------------------------------|
| ygaR | Set 1.850 | g*c*gaagatcagtaaagatataagaagtggtatccctggctattaAcaag<br>gtcagggtttgattccattcattaaagatccagtaacaa*a*a |
| yqaC | Set 1.700 | a*t*taaaaattatgatgggtccacgcgtgtcggcggtgagcgtaActta<br>ataaagggtgctctacctatcagcagcttacaatgaat*t*c   |
| gabT | Set 1.600 | t*c*accattgaagacgctcagatccgtcagggtctggagatcatcagcca<br>gtgtttgatgaggcgaagcagtaAcgccgctcctatgc*c*g  |
| ygaU | Set 1.500 | t*g*acgccaattcccattatccagcagcgatggetggcaattaaTtactc<br>ttccggaatacgaacacttgccccggataaatttat*t*c    |
| ygaM | Set 1.400 | g*t*aggtattttatcggcgcactgttaagcatcgcgcaaatcgtaAtgcaa<br>aaatgataataaatacgcgtctttgaccccgaagcctg*t*c |
| luxS | Set 1.300 | t*t*tgaactggctttttcaattaattgtgaagatagttactgaTtagatgtgc<br>agttcctgcaacttctcttccggcagtgccagt*t*c    |
| mltB | Set 1.250 | a*a*ttttacgaggaggattcagaaaaagctgattagccagagggaaagct<br>cacgccccctcttataatagTtactgtactcgcgcca*g*c   |
| srlE | Set 1.200 | a*c*tgtactgatcgcctggtttgtctccggtttatctatcaataAaggctga<br>aacatgaccgttattatcagaccaccatcacccgt*a*t   |
| norW | Set 1.150 | a*t*cggatgaaagaggcatttgattgtgaaaacattgccgatgtaAgtg<br>ggctactgtgcctaaaatgctggatgcgacgctggcgc*g*t   |
| ascB | Set 1.100 | a*t*cattctggtggtataaaaaagtgattgccagtaatggggaagatttaga<br>gtaAgtaacagtgccggatgcggcgtgaacgccttat*t*c |
| bioD | Set 2.850 | t*c*gaagacgcgatcgcctcgcaatttaaccaatacagaatggTtaca<br>acaaggcaaggttatgtaactttccggttgccgcatitt*t*c   |
| moaE | Set 2.700 | c*g*taaacgtatgtactgagcggtgaaattgccggacgcagcggcctt<br>atccggctaacaaaaaaTtaccagcgtttgccgctgc*t*g     |
| ybhM | Set 2.600 | g*c*gatgtgaagtttagttaagttcttttagtatgtcatttacggTtaatgaa<br>aaaacgcgatgctttgcccagacaagcgttag*t*c     |
| ybhS | Set 2.500 | t*t*tatcggcctgacgtggctgaaaaccaaagcgcgctggattaAggag<br>aagagcatgtttcatcgttatggacgttaatccgcaaa*g*a   |
| ybiH | Set 2.400 | c*a*tatcgacctgattttgcaaggattatcgaaaggagttgtaAtgatga<br>aaaaacctgtcgtatcggattggcggtagtggact*t*g     |
| ybiR | Set 2.300 | t*c*tgaattaatctcaaaaactaaagcaaaaggcggactcataatccgct<br>ttttatttggcagaccTtagttggccgggagtataa*c*t    |
| yliD | Set 2.250 | t*t*tctgtgaggtgattaccctttcaagcaatattcaaacgtaaTtaccctt<br>aatttccgatccagcgcacgcgtaaacatcgc*c*c      |
| yliE | Set 2.200 | g*a*ctgactgtaagtacgaactattgattctggacatacgtaaaTtactctt<br>ttactaattttccactttatcccaggcggagaatg*g*c   |
| ybjK | Set 2.150 | t*c*ggttcaaggtgatgggtttttgttatctaaaacttatctaTtaccctgca<br>acccttcaacctcctcaaatctcctcgcgcg*a*t      |

|          |                      |                                                                                                   |
|----------|----------------------|---------------------------------------------------------------------------------------------------|
| rimK     | Set 2.100            | c*g*c*caaaaagcgcaggcaaaacatgatcagtaatgtgattgcgaTtaaccaccggtttcaggcaatattctgtcgtagcgtggcgtt*c*g    |
| ygfJ     | Set 3.850            | c*c*ggacgactttattacagcgaaggaaaggtatactgaaatttaAaaacgtagttaaacgattgcgttcaaatatttaaccttccg*g*c      |
| recJ     | Set 3.700            | g*g*gattgtaccaatccacgctctttttatagagaagatgacgTtaattggccagatattgtc gatgataatttgcaggctgcggt*t*g      |
| argO     | Set 3.600            | c*t*ctggaggcaagcttagcgcctctgttttattttccatcagatagcgcTtaactgaacaaggcttgcgatgagcaataccgtctc*t*c      |
| yggU     | Set 3.500            | a*a*tccgcaacaatcccgccagaaatcgcgcggttaattaAgtatcctatgcaaaaagtgtcctcgcgaaccggcaatgctggt*a*a         |
| mutY     | Set 3.400            | g*t*ggagcgtttgttacagcagttacgcactggcgcgccggttaAcgctgtagtcgataaagaggatgattatgagcagaacgattt*t*t      |
| glcC     | Set 3.300            | g*c*caccatttgattcgcctcggcgtgcccgtggagatgaacctgagttaActggtataaatctgctttcatacaatcggtaacgtt*t*g      |
| yghQ     | Set 3.250            | a*c*tgagtcagccgagaagaatttccccgcttattcgcacctccTtaaacaggctacacgcttcgagataactaacgcaaacacca*g*c       |
| yghT     | Set 3.200            | t*g*ggtgatgcagaaaagcgttaccgattttatgaccgcgcgtggttactactaTcaaaaaatggaaatgcccgatgccaggaccg*g*g       |
| ygiZ     | Set 3.150            | t*t*ctctgtctatgagagccgttaaacgactctcatagattttaTtaatagcaaaatataaacctccccaaaaagccaccaaccac*a*a       |
| yqiB     | Set 3.100            | a*g*ggtaacaggctttccaaatggtgctcttaggttcacgacgTtaataaacgggaatcgccatcgctccatgtgctaaacagtatc*g*c      |
| ygfJ_AGR | Set 3X.850           | c*c*actatgacccatcagctgataattaccgctgccggattatcatcaAGGatggggcaatggaaaatgatgttaccctgggaaca*g*g       |
| ygfT_AGR | Set 3X.700           | g*a*tgccttcgatcaaacagagttaacatcgcgcgccgctgTCTtctcgcggccattgcagtgacaaccagatccgcgccatgaa*c*t        |
| ubiH_AGR | Set 3X.600           | g*t*gcagagtttgcgccgacttcccaccagcacggtacgatgggtaatagaCCTggcggcgtggggttaacgccagcgataagcactg*c*g     |
| argO_AGR | Set 3X.500           | g*g*attcagccaggtcactgccaacatggtggcgataattttccaCCTgcttcttcatgactcggcgtggctaactcaatattac*t*g        |
| yqgC_AGR | Set 3X.400           | g*a*atcctgagaagcggcagatgggtataacatcggcaggtatgcaaa gcAGGgatgcagagtgcggggaacgaatcttaccagaac*g*g     |
| trmI_AGR | Set 3X.300           | t*t*ttttacgcagacgacggctacggttctttgccattatttcacTCTctgaacattaagtcccatactccgtgaccaagacgatgac*c*a     |
| glcC_AGR | Set 3X.250           | a*c*gatctgctcgacgttcgcgcattactggagggcgaatcggcaAGActgcccggcaacgctgggaacgcaggctgattttgtgtat*a*a     |
| yghT_AGR | Set 3X.200           | g*t*gaacatcttattaccggtgtcgaaaaatggtgctgcccgaAGGgttcatttaggaaaacaggccggaatgtcggctgctgagcagt*g*a    |
| ygiZ_AGR | Set 3X.150           | a*a*tacataaccacaaactgaacatttcccgcataaagagtttCCTtaagataagaataaagtggcgtaagaagaaaaatgctg*c*a         |
| cpdA_AGR | Set 3X.100           | c*t*tcgtgctttgtgcaaacaggtagtgcggttaatttgaataatctgac CCTggcctcaccagccagaggaagggttaacaggct*t*t      |
| lacZ_KO1 | Set lacZ jackpot +61 | T*C*ACTGGCCGTCGTTTTACAACGTCGTGACTGGGAAAACCCTtGaGTTACCCA ACTTAATCGCC TTGCAGCACATCCCCCTTTTCGCCA*G*C |

|                      |                        |                                                                                                         |
|----------------------|------------------------|---------------------------------------------------------------------------------------------------------|
| lacZ_KO2             | Set lacZ jackpot +264  | G*C*TGGAGTGCGATCTTCCTGAGGCCGATAC<br>TGTCGTCGTCCCCTCAAtAaTGGCAGATGCACGG<br>TTACGATGCGCCCATCTACACCAAC*G*T |
| lacZ_KO3             | Set lacZ jackpot +420  | C*A*CATTTAATGTTGATGAAAGCTGGCTACA<br>GGAAGGCCAGACGtaAATTATTTTTGATGGCGT<br>TAACTCGGCGTTTCATCTGTGGTGC*A*A  |
| lacZ_KO4             | Set lacZ jackpot +602  | T*G*ATGGTGCTGCGCTGGAGTGACGGCAGTT<br>ATCTGGAAGATCAGtAgATGTGGCGGATGAGC<br>GGCATTTTCCGTGACGTCTCGTTGCT*G*C  |
| lacZ_KO5             | Set lacZ jackpot +693  | T*A*AACCGACTACACAAATCAGCGATTTCCA<br>TGTTGCCACTCGCTaaAATGATGATTTAGCCG<br>CGCTGTACTGGAGGCTGAAGTTCAG*A*T   |
| lacZ_KO6             | Set lacZ jackpot +1258 | T*A*CGGCCTGTATGTGGTGGATGAAGCCAAT<br>ATTGAAACCCACtGaATGGTGCCAATGAATCGT<br>CTGACCGATGATCCGCGCTGGCTAC*C*G  |
| lacZ_KO7             | Set lacZ jackpot +1420 | G*G*GAATGAATCAGGCCACGGCGCTAATCAC<br>GACGCGCTGTATtGaTGGATCAAATCTGTGAT<br>CCTTCCCGCCCGGTGCAGTATGAAG*G*C   |
| lacZ_KO8             | Set lacZ jackpot +1599 | G*T*CCATCAAAAAATGGCTTTCGCTACCTGG<br>AGAGACGCGCCCGtaGATCCTTTGCGAATACGC<br>CCACGCGATGGGTAACAGTCTTGGC*G*G  |
| lacZ_KO9             | Set lacZ jackpot +1710 | G*T*TTCGTCAGTATCCCCGTTTACAGGGCGGC<br>TTCGTCTGGGACTaaGTGGATCAGTCGCTGATT<br>AAATATGATGAAAACGGCAACCCG*T*G  |
| lacZ_KO10            | Set lacZ jackpot +1890 | A*G*CGCTGACGGAAGCAAAACACCAGCAGC<br>AGTTTTTCCAGTTtGaTTATCCGGGCAAACCA<br>TCGAAGTGACCAGCGAATACCTGTTC*C*G   |
| ygfJ_2*:2*_1<br>ead  | Set 3.850_lead oligo   | G*C*CGGAAGGATTAATATTTGAACGCAATC<br>GTTAACTACGTTTTTTAAATTTAGTATACT<br>TTCCTTCGCTGTAATAAAGTCGTCC*G*G      |
| recJ_2*:2*_1<br>ead  | Set 3.700_lead oligo   | C*A*ACCGCAGCCTGCAAATTATCATCGACAA<br>TATCTGGCCAATTTAACGTCATCTTCTCTATAA<br>AAAAGAGCGTGGATTGGGTACAATC*C*C  |
| argO_2*:2*_<br>lead  | Set 3.600_lead oligo   | G*A*GAGACGGTATTGCTCATGCACAAGCCTT<br>GTTCAGTTAAGCGCTATCTGATGGAAAAATAA<br>AACAGAGGCGCTAAGCTTGCCTCCAG*A*G  |
| yggU_2*:2*_<br>lead  | Set 3.500_lead oligo   | T*T*ACCGACATTGCCGGTTGCGAGGACAAC<br>TTTTGCATAGGATACTTAATTAATTAACGCCG<br>CGATTTCTGGCGGGATTGTTGCGGA*T*T    |
| mutY_2*:2*_<br>_lead | Set 3.400_lead oligo   | A*A*AAATCGTTCTGCTCATAAATCATCCTCTT<br>TATCGACTCACGCGTTAAACCGGCGCGCCAGT<br>GCGTAACTGCTGTAACAAACGCTCC*A*C  |
| glcC_2*:2*_1<br>ead  | Set 3.300_lead oligo   | C*A*AGCGTTACCGATTGTATGAAAAGCAGAT<br>TTAATACCAGTTAACTCAGGTTTCATCTCCAGC<br>GGCACCGCCGAGCGAATCAAATGGTG*G*C |
| yghQ_2*:2*_<br>_lead | Set 3.250_lead oligo   | G*C*TGGTGTGGCGTTAAGTATCTCGAAGCG                                                                         |

|                      |                                                                                                               |                                                                                                        |
|----------------------|---------------------------------------------------------------------------------------------------------------|--------------------------------------------------------------------------------------------------------|
| lead                 |                                                                                                               | TATGACCTGATTTAAGGAAGGTGCGAATAAGC<br>GGGGAAATTCTTCTCGGCTGACTCA*G*T                                      |
| yghT_2*:2*_<br>lead  | Set 3.200_lead oligo                                                                                          | C*C*CGGTCCTGGCGATCGGGCATTTCATTTT<br>TGATTAGTGATAACCACGCGCGGTCATAAAAT<br>CCGTAATCGCTTTTTCTGCATCAAC*C*A  |
| ygiZ_2*:2*_1<br>lead | Set 3.150_lead oligo                                                                                          | T*T*GTGGTTGGTGGCTTTTTTGGGGACGGTTT<br>ATATTTTGCTATTAATAAAATCTATGAGAGTC<br>GTTTAAACGGCTCTCATAGACAGAG*A*A |
| yqiB_2*:2*_1<br>lead | Set 3.100_lead oligo                                                                                          | G*C*GATACTGTTTAGCACATGGAGCGATGGC<br>GATTCCGTTTATTAACGTCGTGAAACCTAAG<br>GACACCATTGGAAAGCCTGTTAACC*C*T   |
| exoX.KO*             | exoX KO oligo                                                                                                 | t*t*c*g*gctggagcatgcatgtgcgattatcgatacagaaacTG<br>Atgcggttgaggggagggatcggtgagattgcctctggtgatg          |
| xseA.KO*             | xseA KO oligo                                                                                                 | g*a*a*t*ttgatctcgctcacatgttaccttctcaatcccctgcaatTGAtt<br>taccgtagtcgctgaatcaaacgggtcgtctgctgcttg       |
| recJ.KO*             | recJ KO oligo                                                                                                 | g*g*a*g*gcaattcagcgggcaagctgccgtttcatcgacttcacgTC<br>Acgacgaagttgatctgttgccttcacgcgaattattaccgct       |
| xonA.KO*             | xonA KO oligo                                                                                                 | a*a*t*a*acggatttaacctaataatgatgaatgacggtaagcaacaateTG<br>Aaccttttgcctcagattacgaaaccttggcagcaccaccg     |
| Lexo.KO.M<br>M*      | Lambda exo KO oligo                                                                                           | t*g*a*a*acagaaagccgagagcagaaggtggcagcatgacaccgt<br>aacattatcctgcagcgtaccgggatcgtgagagctgtcgaac         |
| dnaG_Q576<br>A       | Oligo to make dnaG<br>Q576A mutation                                                                          | gcacgcatggttaagcaacgaagaacgcctggagctctggacattaaac<br><u>GC</u> ggaActggcgaaaaagtgattaacggcttaagtgccg   |
| dnaG_K580<br>A       | Oligo to make dnaG<br>K580A mutation                                                                          | cgcacgcatggttaagcaacgaagaacgcctggagctctggacattaaac<br>caggaActggcg <u>GC</u> aaagtgattaacggcttaagtgcc  |
| tolC.90.del          | Oligo that deletes<br>endogenous tolC                                                                         | gaatttcagcgacgttgactgccgttgagcagtcagtggttaaagcttcggc<br>cccgtctgaacgtaaggcaacgtaagatacgggttat          |
| galK_KO1.1<br>00     | Oligo to delete 100 bp<br>including a portion of<br>galK                                                      | C*G*CGCAGTCAGCGATATCCATTTTCGCGAAT<br>CCGGAGTGTAAGAAAACACACCGACTACAAC<br>GACGGTTTCGTTCTGCCCTGCGCGAT*T*G |
| galK_KO1.1<br>149    | Oligo to delete 1149<br>bp including a portion<br>of galK                                                     | C*G*CGCAGTCAGCGATATCCATTTTCGCGAAT<br>CCGGAGTGTAAGAAACGAAACTCCCGCACTG<br>GCACCCGATGGTCAGCCGTACCGACT*G*T |
| galK_KO1.7<br>895    | Oligo to delete 7895<br>bp including a portion<br>of galK, galM, gpmA,<br>aroG, ybgS, zitB,<br>pnuC, and nadA | C*G*CGCAGTCAGCGATATCCATTTTCGCGAAT<br>CCGGAGTGTAAGAACTTACCATCTCGTTTTAC<br>AGGCTTAACGTTAAAACCGACATTA*G*C |
| ygaR_wt-f            | Set 1.850_wt-f<br>mascPCR                                                                                     | AAGGTGGTATCCCTGGCTATTAG                                                                                |
| yqaC_wt-f            | Set 1.700_wt-f<br>mascPCR                                                                                     | CGGCGGTGAGGCGTAG                                                                                       |
| gabT_wt-f            | Set 1.600_wt-f<br>mascPCR                                                                                     | TTTTGATGAGGCGAAGCAGTAG                                                                                 |
| ygaU_wt-f            | Set 1.500_wt-f<br>mascPCR                                                                                     | GTTGCGTATTCCGGAAGAGTAG                                                                                 |

|           |                           |                                       |
|-----------|---------------------------|---------------------------------------|
| ygaM_wt-f | Set 1.400_wt-f<br>mascPCR | GTTAAGCATGCGCAAATCGTAG                |
| luxS_wt-f | Set 1.300_wt-f<br>mascPCR | GTTGCAGGAACTGCACATCTAG                |
| mltB_wt-f | Set 1.250_wt-f<br>mascPCR | GCTGGCGCGAGTACAGTAG                   |
| srlE_wt-f | Set 1.200_wt-f<br>mascPCR | GGTTTGTCTCCGGTTTTATCTATCAATAG         |
| norW_wt-f | Set 1.150_wt-f<br>mascPCR | GATTGTTGAAAACATTGCCGATGTAG            |
| ascB_wt-f | Set 1.100_wt-f<br>mascPCR | CCAGTAATGGGGAAGATTTAGAGTAG            |
| bioD_wt-f | Set 2.850_wt-f<br>mascPCR | AGTACATAAACCTTGCCTTGTTGTAG            |
| moaE_wt-f | Set 2.700_wt-f<br>mascPCR | GCGGCAAAACGCTGGTAG                    |
| ybhM_wt-f | Set 2.600_wt-f<br>mascPCR | AAGGCATACGCGTTTTTTTCATTAG             |
| ybhS_wt-f | Set 2.500_wt-f<br>mascPCR | CCAAACGTCGGCTGGATTAG                  |
| ybiH_wt-f | Set 2.400_wt-f<br>mascPCR | AAGGATTATCGCAAAGGAGTTTGTAG            |
| ybiR_wt-f | Set 2.300_wt-f<br>mascPCR | TTAGTTATACTCCCGGCCAACTAG              |
| yliD_wt-f | Set 2.250_wt-f<br>mascPCR | CGCTGGATCCGAAAATTAAGGATAG             |
| yliE_wt-f | Set 2.200_wt-f<br>mascPCR | TGGGATAAAAGTGGAAAATTAGTAAAAGAGT<br>AG |
| ybjK_wt-f | Set 2.150_wt-f<br>mascPCR | TTGAGAGGGTTGCAGGGTAG                  |
| rimK_wt-f | Set 2.100_wt-f<br>mascPCR | GCCTGAAAACGGGTGGTTAG                  |
| ygfJ_wt-f | Set 3.850_wt-f<br>mascPCR | AGCGAAGGAAAGGTATACTGAAATTTAG          |
| recJ_wt-f | Set 3.700_wt-f<br>mascPCR | TCATCGACAATATCTGGCCAATTTAG            |
| argO_wt-f | Set 3.600_wt-f<br>mascPCR | TGCACAAGCCTTGTTTCAGTTAG               |
| yggU_wt-f | Set 3.500_wt-f<br>mascPCR | CAGAAATCGCGGCGTTAATTAATTAG            |
| mutY_wt-f | Set 3.400_wt-f<br>mascPCR | GGCGCGCCGGTTTAG                       |
| glcC_wt-f | Set 3.300_wt-f<br>mascPCR | GCTGGAGATGAACCTGAGTTAG                |
| yghQ_wt-f | Set 3.250_wt-f<br>mascPCR | CTCGAAGCGTATGACCTGATTTAG              |

|                     |                                      |                                           |
|---------------------|--------------------------------------|-------------------------------------------|
| yghT_wt-f           | Set 3.200_wt-f<br>mascPCR            | CGCGCGTGGTTATCACTAG                       |
| ygiZ_wt-f           | Set 3.150_wt-f<br>mascPCR            | TGGGGACGGTTTATATTTTGCTATTAG               |
| yqiB_wt-f           | Set 3.100_wt-f<br>mascPCR            | CGATGGCGATTCCGGTTTATTAG                   |
| ygfJ_WT             | Set 3X.850_wt-f<br>mascPCR           | GCTGCCGGATTATCATCAAGA                     |
| ygfT_WT             | Set 3X.700_wt-f<br>mascPCR           | GCAATGGCCGCAGGAAGG                        |
| ubiH_WT             | Set 3X.600_wt-f<br>mascPCR           | GCACGGTACGATGGGTAATAGAT                   |
| argO_WT             | Set 3X.500_wt-f<br>mascPCR           | GAAGTCATGAAGCAAGGCAGA                     |
| yqgC_WT             | Set 3X.400_wt-f<br>mascPCR           | CGGCAGGTATGCAAAGCAGA                      |
| trmI_WT             | Set 3X.300_wt-f<br>mascPCR           | AGTATGGGACTTAATGTTTCGAGAGG                |
| glcC_WT             | Set 3X.250_wt-f<br>mascPCR           | AGGGCGAATCGGCAAGG                         |
| yghT_WT             | Set 3X.200_wt-f<br>mascPCR           | GAAAAATATGGTGCTGCCGAAAGA                  |
| ygiZ_WT             | Set 3X.150_wt-f<br>mascPCR           | CTTCTTACGCCACTTATTATTCTTATCTTAAGA         |
| cpdA_WT             | Set 3X.100_wt-f<br>mascPCR           | TGGCTGGTGAGGCCAGA                         |
| exoX.KO*-<br>wt-f   | exoX wt-f mascPCR<br>primer          | GCGCATTATCGATACAGAAACCT                   |
| xseA.KO*-<br>wt-f   | xseA wt-f mascPCR<br>primer          | CTTCTCAATCCCCTGCAATTTTTACC                |
| recJ.KO*-<br>wt-f   | recJ wt-f mascPCR<br>primer          | CAACAGATACAACCTTCGTCGCC                   |
| xonA.KO*-<br>wt-f   | xonA wt-f mascPCR<br>primer          | GAATGACGGTAAGCAACAATCTACC                 |
| Lexo_WT-f           | Lambda exo KO wt-f<br>mascPCR primer | GGCAGCATGACACCGGA                         |
| dnaG_Q576<br>A_wt-f | dnaG_Q576A wt-f<br>mascPCR primer    | TGGAGCTCTGGACATTA <u>AA</u> CCA           |
| dnaG_K580<br>A_wt-f | dnaG_K580A wt-f<br>mascPCR primer    | CATTAAACC <u>AG</u> GGA <u>ACT</u> GGCGAA |
| ygaR_mut-f          | Set 1.850_mut-f<br>mascPCR           | AAGGTGGTATCCCTGGCTATTAA                   |
| yqaC_mut-f          | Set 1.700_mut-f<br>mascPCR           | CGGCGGTGAGGCGTAA                          |
| gabT_mut-f          | Set 1.600_mut-f<br>mascPCR           | TTTTGATGAGGCGAAGCAGTAA                    |

|            |                            |                                        |
|------------|----------------------------|----------------------------------------|
| ygaU_mut-f | Set 1.500_mut-f<br>mascPCR | GTTGCGTATTCCGGAAGAGTAA                 |
| ygaM_mut-f | Set 1.400_mut-f<br>mascPCR | GTAAAGCATGCGCAAATCGTAA                 |
| luxS_mut-f | Set 1.300_mut-f<br>mascPCR | GTTGCAGGAACTGCACATCTAA                 |
| mltB_mut-f | Set 1.250_mut-f<br>mascPCR | GCTGGCGCGAGTACAGTAA                    |
| srlE_mut-f | Set 1.200_mut-f<br>mascPCR | GGTTTGTCTCCGGTTTTATCTATCAATAA          |
| norW_mut-f | Set 1.150_mut-f<br>mascPCR | GATTGTTGAAAACATTGCCGATGTAA             |
| ascB_mut-f | Set 1.100_mut-f<br>mascPCR | CCAGTAATGGGGAAGATTTAGAGTAA             |
| bioD_mut-f | Set 2.850_mut-f<br>mascPCR | AGTACATAAACCTTGCCTTGTTGTAA             |
| moaE_mut-f | Set 2.700_mut-f<br>mascPCR | GCGGCAAACGCTGGTAA                      |
| ybhM_mut-f | Set 2.600_mut-f<br>mascPCR | AAGGCATACGCGTTTTTTTCATTAA              |
| ybhS_mut-f | Set 2.500_mut-f<br>mascPCR | CCAAACGTCGGCTGGATTAA                   |
| ybiH_mut-f | Set 2.400_mut-f<br>mascPCR | AAGGATTATCGCAAAGGAGTTTGTAA             |
| ybiR_mut-f | Set 2.300_mut-f<br>mascPCR | TTAGTTATACTCCCGGCCAACTAA               |
| yliD_mut-f | Set 2.250_mut-f<br>mascPCR | CGCTGGATCCGAAAATTAAAGGATAA             |
| yliE_mut-f | Set 2.200_mut-f<br>mascPCR | TGGGATAAAAAGTGGAAAATTAGTAAAAGAGT<br>AA |
| ybjK_mut-f | Set 2.150_mut-f<br>mascPCR | TTGAGAGGGTTGCAGGGTAA                   |
| rimK_mut-f | Set 2.100_mut-f<br>mascPCR | GCCTGAAAACGGGTGGTAA                    |
| ygfJ_mut-f | Set 3.850_mut-f<br>mascPCR | AGCGAAGGAAAGGTATACTGAAATTTAA           |
| recJ_mut-f | Set 3.700_mut-f<br>mascPCR | TCATCGACAATATCTGGCCAATTTAA             |
| argO_mut-f | Set 3.600_mut-f<br>mascPCR | TGCACAAGCCTTGTTTCAGTTAA                |
| yggU_mut-f | Set 3.500_mut-f<br>mascPCR | CAGAAATCGCGGCGTTAATTAATTTAA            |
| mutY_mut-f | Set 3.400_mut-f<br>mascPCR | GGCGCGCCGGTTTAA                        |
| glcC_mut-f | Set 3.300_mut-f<br>mascPCR | GCTGGAGATGAACCTGAGTTAA                 |

|                      |                                       |                                   |
|----------------------|---------------------------------------|-----------------------------------|
| yghQ_mut-f           | Set 3.250_mut-f<br>mascPCR            | CTCGAAGCGTATGACCTGATTAA           |
| yghT_mut-f           | Set 3.200_mut-f<br>mascPCR            | CGCGCGTGGTTATCACTAA               |
| ygiZ_mut-f           | Set 3.150_mut-f<br>mascPCR            | TGGGGACGGTTTATATTTTGCTATTAA       |
| yqiB_mut-f           | Set 3.100_mut-f<br>mascPCR            | CGATGGCGATTCCGGTTTATTAA           |
| ygfJ_MUT             | Set 3X.850_mut-f<br>mascPCR           | GCTGCCGGATTATCATCAAGG             |
| ygfT_MUT             | Set 3X.700_mut-f<br>mascPCR           | GCAATGGCCGCAGGAAGA                |
| ubiH_MUT             | Set 3X.600_mut-f<br>mascPCR           | GCACGGTACGATGGGTAATAGAC           |
| argO_MUT             | Set 3X.500_mut-f<br>mascPCR           | GAAGTCATGAAGCAAGGCAGG             |
| yqgC_MUT             | Set 3X.400_mut-f<br>mascPCR           | GGCAGGTATGCAAAGCAGG               |
| trmI_MUT             | Set 3X.300_mut-f<br>mascPCR           | GAGTATGGGACTTAATGTTCGAGAGA        |
| glcC_MUT             | Set 3X.250_mut-f<br>mascPCR           | GAGGGCGAATCGGCAAGA                |
| yghT_MUT             | Set 3X.200_mut-f<br>mascPCR           | AAAATATGGTGCTGCCGAAAGG            |
| ygiZ_MUT             | Set 3X.150_mut-f<br>mascPCR           | CTTCTTACGCCACTTATTATTCTTATCTTAAGG |
| cpdA_MUT             | Set 3X.100_mut-f<br>mascPCR           | GGCTGGTGAGGCCAGG                  |
| exoX.KO*-<br>mut-f   | exoX mut-f mascPCR<br>primer          | GCGCATTATCGATACAGAACTGA           |
| xseA.KO*-<br>mut-f   | xseA mut-f mascPCR<br>primer          | CTTCTCAATCCCCTGCAATTGA            |
| recJ.KO*-<br>mut-f   | recJ mut-f mascPCR<br>primer          | CAACAGATACA ACTTCGTCGTGA          |
| xonA.KO*-<br>mut-f   | xonA mut-f mascPCR<br>primer          | GAATGACGGTAAGCAACAATCTGA          |
| Lexo_MUT-f           | Lambda exo KO mut-f<br>mascPCR primer | TGGCAGCATGACACCGTAA               |
| dnaG_Q576<br>A_mut-f | dnaG_Q576A mut-f<br>mascPCR primer    | GGAGCTCTGGACATTAAACGC             |
| dnaG_K580<br>A_mut-f | dnaG_K580A mut-f<br>mascPCR primer    | ACCAGGAACTGGCGGC                  |
| ygaR_rev             | Set 1.850_rev<br>mascPCR              | TAGGTAGAGCAACCTTTATTAAGCTACG      |
| yqaC_rev             | Set 1.700_rev<br>mascPCR              | TAAAAATATCTACATTTCTGAAAAATGCGCA   |



|          |                          |                                             |
|----------|--------------------------|---------------------------------------------|
| gabT_rev | Set 1.600_rev<br>mascPCR | GCGGCGATGTTGGCTT                            |
| ygaU_rev | Set 1.500_rev<br>mascPCR | AGGGTATCGGGTGGCG                            |
| ygaM_rev | Set 1.400_rev<br>mascPCR | CGCAACGCTTCTGCCG                            |
| luxS_rev | Set 1.300_rev<br>mascPCR | ATGCCCAGGCGATGTACA                          |
| mltB_rev | Set 1.250_rev<br>mascPCR | AGACTCGGCAGTTGTTACGG                        |
| srlE_rev | Set 1.200_rev<br>mascPCR | GGATGGAGTGCACCTTTCAAC                       |
| norW_rev | Set 1.150_rev<br>mascPCR | GTGTTGCATTTGGACACCATTG                      |
| ascB_rev | Set 1.100_rev<br>mascPCR | CGCTTATCGGGCCTTCATG                         |
| bioD_rev | Set 2.850_rev<br>mascPCR | CGGGAAGAACTCTTTCATTTTCGC                    |
| moaE_rev | Set 2.700_rev<br>mascPCR | CGTCAATCCGACAAAGACAATCA                     |
| ybhM_rev | Set 2.600_rev<br>mascPCR | TACTGGCAGGGATTATCTTTACCG                    |
| ybhS_rev | Set 2.500_rev<br>mascPCR | CTGTTGTTAGGTTTCGGTTTTCT                     |
| ybiH_rev | Set 2.400_rev<br>mascPCR | GTCATAGGCGGCTTGCG                           |
| ybiR_rev | Set 2.300_rev<br>mascPCR | ATGAGCCGGTAAAAGCGAC                         |
| yliD_rev | Set 2.250_rev<br>mascPCR | AATAAAATTATCAGCCTTATCTTTATCTTTTCG<br>TATAAA |
| yliE_rev | Set 2.200_rev<br>mascPCR | CAGCAATATTTGCCACCGCA                        |
| ybjK_rev | Set 2.150_rev<br>mascPCR | AACTTTTCCGCAGGGCATC                         |
| rimK_rev | Set 2.100_rev<br>mascPCR | TACAACCTCTTTCGATAAAAAGACCG                  |
| ygfJ_rev | Set 3.850_rev<br>mascPCR | GATGAACTGTTGCATCGGCG                        |
| recJ_rev | Set 3.700_rev<br>mascPCR | CTGTACGCAGCCAGCC                            |
| argO_rev | Set 3.600_rev<br>mascPCR | AATCGCTGCCTTACGCG                           |
| yggU_rev | Set 3.500_rev<br>mascPCR | TAACCAAAGCCACCAGTGC                         |
| mutY_rev | Set 3.400_rev<br>mascPCR | CGCGAGATATTTTTTCATCATTCCG                   |

|            |                                                        |                               |
|------------|--------------------------------------------------------|-------------------------------|
| glcC_rev   | Set 3.300_rev<br>mascPCR                               | GGGCAAATGCTGTGGC              |
| yghQ_rev   | Set 3.250_rev<br>mascPCR                               | ACCAACTGGCGATGTTATTCAC        |
| yghT_rev   | Set 3.200_rev<br>mascPCR                               | GACGATGGTGGTGGACGG            |
| ygiZ_rev   | Set 3.150_rev<br>mascPCR                               | ATCGCCAAATTGCATGGCA           |
| yqiB_rev   | Set 3.100_rev<br>mascPCR                               | AAAATCCTGACTCTGGCCTCA         |
| ygfJ_rev   | Set 3X.850_rev<br>mascPCR                              | TCTGTTTGCCTGCGGGTAC           |
| ygfT_rev   | Set 3X.700_rev<br>mascPCR                              | TGGTTGGGCAATCTAATAGATTCTCC    |
| ubiH_rev   | Set 3X.600_rev<br>mascPCR                              | atgAGCGTAATCATCGTCGGTG        |
| argO_rev   | Set 3X.500_rev<br>mascPCR                              | CCGTCTCTCGCCAGCTG             |
| yqgC_rev   | Set 3X.400_rev<br>mascPCR                              | AGCACACGACGTTTCTTTCG          |
| trmI_rev   | Set 3X.300_rev<br>mascPCR                              | ATCTGTTCTTCCGATGTACCTTCC      |
| glcC_rev   | Set 3X.250_rev<br>mascPCR                              | CTTCCAGCTCGATATCGTGGAG        |
| yghT_rev   | Set 3X.200_rev<br>mascPCR                              | CACCACCAAAGGTTAACTGTGG        |
| ygiZ_rev   | Set 3X.150_rev<br>mascPCR                              | CACAAACCAGACAAATACCGAGC       |
| cpdA_rev   | Set 3X.100_rev<br>mascPCR                              | CGATGGTATCCAGCGTAAAGTTG       |
| exoX.KO*-r | exoX rev mascPCR<br>primer                             | GACCATGGCTTCGGTGATG           |
| xseA.KO*-r | xseA rev mascPCR<br>primer                             | GGTACGCTTAAGTTGATTTTCCAGC     |
| recJ.KO*-r | recJ rev mascPCR<br>primer                             | GGCCTGATCGACCACTTCC           |
| xonA.KO*-r | xonA rev mascPCR<br>primer                             | GAAATGTCTCCTGCCAAATCCAC       |
| Lexo-r     | Lambda exo KO rev<br>mascPCR primer                    | CAAGGCCGTTGCCGTC              |
| dnaG_seq-r | dnaG rev mascPCR<br>primer for both<br>Q576A and K580A | <u>GCTCCATAAGACGGTATCCACA</u> |
| Rx-P19     | forward screening<br>primer for wt tolC<br>deletion    | GTTTCTCGTGCAATAATTTCTACATC    |

|                        |                                                    |                                                                                                         |
|------------------------|----------------------------------------------------|---------------------------------------------------------------------------------------------------------|
| Rx-P20                 | reverse screening primer for wt tolC deletion      | CGTATGGATTTTGTCCGTTTCA                                                                                  |
| lacZ_jackpot_seq-f     | forward sequencing primer for lacZ jackpot alleles | GAATTGTGAGCGGATAACAATTTC                                                                                |
| lacZ_jackpot_seq-r     | reverse sequencing primer for lacZ jackpot alleles | CCAGCGGCTTACCATCC                                                                                       |
| cat_mut*               | cat inactivation oligo                             | G*C*ATCGTAAAGAACATTTTGAGGCATTTCA<br>GTCAGTTGCTTAATGTACCTATAACCAGACCG<br>TTCAGCTGGATATTACGGCCTTTTAA*A*A  |
| cat_restore*           | cat reactivation oligo                             | G*C*ATCGTAAAGAACATTTTGAGGCATTTCA<br>GTCAGTTGCTCAATGTACCTATAACCAGACCG<br>TTCAGCTGGATATTACGGCCTTTTAA*A*A  |
| tolC-r_null_mut*       | tolC inactivation oligo                            | A*G*CAAGCACGCCTTAGTAACCCGGAATTGC<br>GTAAGTCTGCCGCTAAATCGTGATGCTGCCTT<br>TGAAAAAATTAATGAAGCGCGCAGTCCA    |
| tolC-r_null_revert*    | tolC reactivation oligo                            | C*A*GCAAGCACGCCTTAGTAACCCGGAATTG<br>CGTAAGTCTGCCGCCGATCGTGATGCTGCCTT<br>TGAAAAAATTAATGAAGCGCGCAGTCCA    |
| tolC_null_revert*      | tolC reactivation oligo (leading targeting)        | T*G*GACTGCGCGCTTCATTAATTTTTTCAAAG<br>GCAGCATCACGATCGGGCGGCAGACTTACGCA<br>ATTCCGGGTTACTAAGGCGTGCTTGCTG   |
| bla_mut*               | bla inactivation oligo                             | G*C*C*A*CATAGCAGAACTTTAAAAGTGCTCA<br>TCATTGGAAAACGTTATTAGGGGCGAAAACCTC<br>TCAAGGATCTTACCGCTGTTGAGATCCAG |
| bla_restore*           | bla reactivation oligo                             | G*C*C*A*CATAGCAGAACTTTAAAAGTGCTCA<br>TCATTGGAAAACGTTCTTCGGGGCGAAAACCTC<br>TCAAGGATCTTACCGCTGTTGAGATCCAG |
| 313000.T.lacZ.coMAGE-f | Cassette primer for T.co-lacZ (lacZ coselection)   | TGCTTCTCATGAACGATAACACAACCTTGTTCA<br>TGAATTAACCATTCCGGATTGAGGCACATTAA<br>CGCC                           |
| 313001.T.lacZ.coMAGE-r | Cassette primer for T.co-lacZ (lacZ coselection)   | ACGGAAACCAGCCAGTTCCTTTCGATGCCTGA<br>ATTTGATCCCATAGTTTATCTAGGGCGGCGGA<br>TT                              |
| 312869.seq-f           | Screening primer for tolC (lacZ coselection)       | GAACTTGCACCTACCCATCG                                                                                    |
| 313126.seq-r           | Screening primer for tolC (lacZ coselection)       | AGTGACGGGTTAATTATCTGAAAG                                                                                |
| 1255700.S.1 2.13b-f    | Cassette primer for S.12.13b                       | TTTCATCTTGCCAGCATATTGGAGCGTGATCA<br>ATTTTGATCAGCTGTGAACAGCCAGGACAGAA<br>ATGC                            |
| 1255701.S.1 2.13b -r   | Cassette primer for S.12.13b                       | CATTAGCAGTGATATAACGTAAGTTTTTGTAT<br>CACTACACATCAGCCCCCTGCAGAAATAAAA<br>AGGCCTGC                         |

|                        |                                   |                                                                                  |
|------------------------|-----------------------------------|----------------------------------------------------------------------------------|
| 1255550.Seq<br>-f      | Screening primer for<br>S.12.13b  | CATTTTTGCATTACTAATAAGAAAAAGCAAA                                                  |
| 1255850.Seq<br>-r      | Screening primer for<br>S.12.13b  | GTCCTAATCATTCTTGTAACATCCTAC                                                      |
| 1710450.Z.1<br>6.17b-f | Cassette primer for<br>Z.16.17b   | TCAGGTTAAAATCATTAAATTTACACACGCA<br>ACAAATATTGACCTACAAGGTGTTGACAATTA<br>ATCATCGGC |
| 1710451.Z.1<br>6.17b-r | Cassette primer for<br>Z.16.17b   | TTTTTACTAGTGAGATAGTCCAGTTTCTGAAA<br>AATAGCCAGTGTAATGTTAGCTTGCAAATTAA<br>AGCCTTCG |
| 1710300.Seq<br>-f      | Screening primer for<br>Z.16.17b  | TCAGGTAATCCGTTTGCGG                                                              |
| 1710600.Seq<br>-r      | Screening primer for<br>Z.16.17b  | AACGGCAGATTTTTTCACTGC                                                            |
| LacZ::KanR.<br>full-f  | Cassette primer for<br>lacZ::kanR | TGACCATGATTACGGATTCACTGGCCGTCGTT<br>TTACAACGTCGTGCCTGTGACGGAAGATCACT<br>TCG      |
| LacZ::KanR.<br>full-r  | Cassette primer for<br>lacZ::kanR | GTGCTGCAAGGCGATTAAGTTGGGTAACGCCA<br>GGGTTTTCCAGTAACCAGCAATAGACATAAG<br>CGG       |

**Table S2: Estimation of Okazaki fragment length in EcNR2.dnaG.K580A and EcNR2.dnaG.Q576A**

| [Primase] (nM)                            | WT dnaG Okazaki Frag (kb) | K580A Okazaki Frag (kb) | Q576A Okazaki Frag (kb) |
|-------------------------------------------|---------------------------|-------------------------|-------------------------|
| 80                                        | 2.5                       | 5                       | 23                      |
| 160                                       | 1.5                       | 2.5                     | 18                      |
| 320                                       | 1                         | 1                       | 8                       |
| 640                                       | 0.8                       | nd                      | 3                       |
| <b>Average Fold effect compared to WT</b> |                           | <b>1.6</b>              | <b>8.2</b>              |

Average Okazaki Fragment length was estimated based on *in vitro* results (gel images) from Tougu et al. (2) for the same DnaG primase variants, tabulated above. We compared the fold difference in OF sizes for the specified primase concentrations and determined the average fold difference (variant OF length/wt OF length). We estimate *in vivo* OF lengths of ~2.3-3.1 kb and ~12-16 kb for the K580A and Q576A mutants, respectively, based on the reported ~1.5-2 kb OF lengths in wt cells grown in rich media (3-5). However, these approximations may be imperfect since Tougu et al. (2) performed this analysis *in vitro* and did not use the same EcNR2.dnaG.K580A and EcNR2.dnaG.Q576A strains. Other conditions and/or host factors not accounted for *in vitro* may affect priming efficiency, thereby rendering these calculations inaccurate.

## Supplemental Figures

Figure S1. Effect of *dnaG* variants and co-selection on leading-targeting CoS-MAGE

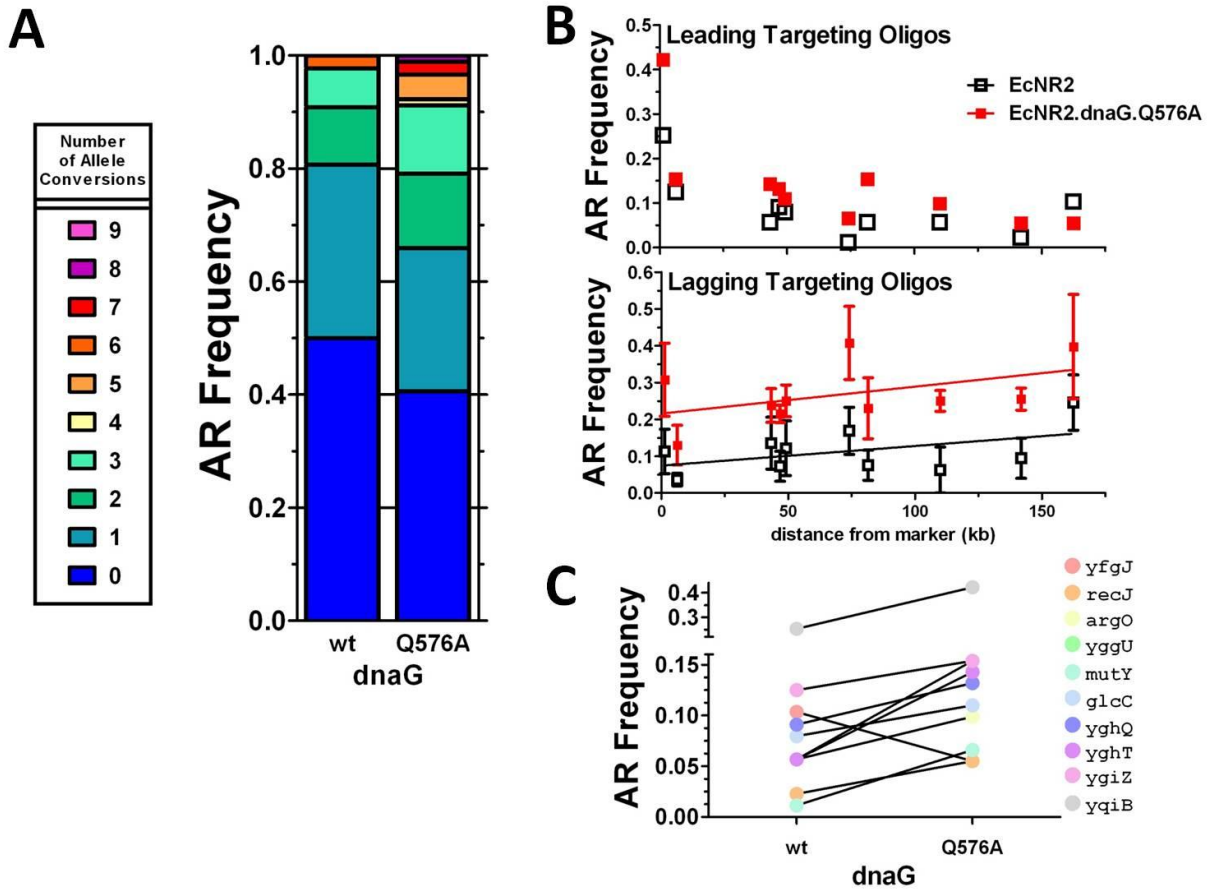

(A) EcNR2.*dnaG*.Q576A (n=91) outperformed EcNR2 (wt, n=88) in leading-targeting Set 3 CoS-MAGE, with a reduction in zero conversion events as well as a broadening of the distribution of total allele conversions per clone. (B) For leading-targeting Set 3 oligos, AR frequency decays rapidly with increasing distance from the selectable marker (top panel). In contrast, co-selection using the corresponding set of lagging targeting oligos (see also Figure 3C, right panel) provides robust co-selection spanning at least 0.162 Mb (bottom panel). For the lagging-targeting oligos (bottom panel), linear regression analyses (solid trendline) show that co-selection does not decrease with distance for either strain over this 0.162 Mb genomic region. (C) Individual CoS-MAGE AR frequency is plotted for each leading-targeting Set 3 oligo in EcNR2 (wt) and EcNR2.*dnaG*.Q576A (Q576A). AR frequency is improved for 9/10 alleles in EcNR2.*dnaG*.Q576A. Note that the most proximal allele to the selectable marker (*yqiB*) is separated from the other alleles with a broken axis, since its AR frequency was much higher than that of the others.

Figure S2. Effect of *dnaG* attenuation on deletion frequency

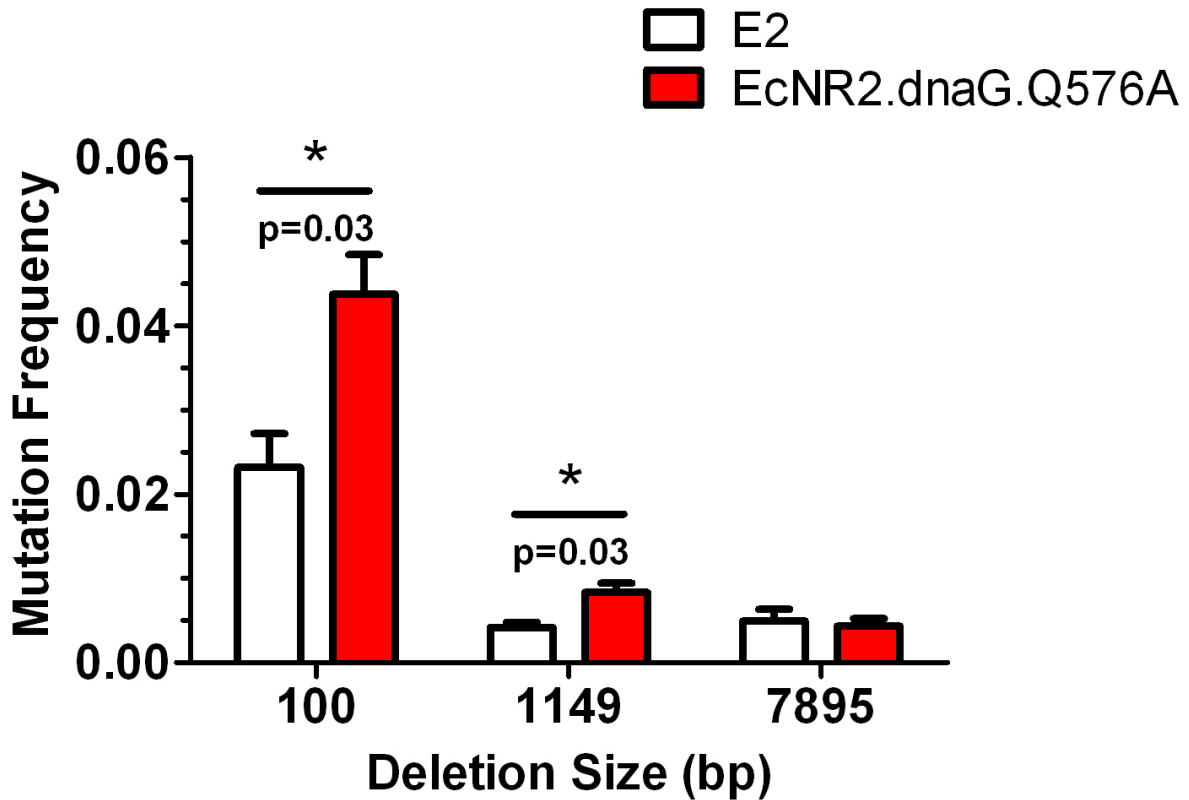

DnaG primase disruption enhances gene-sized deletion frequency. Oligos that deleted 100 bp, 1,149 bp, or 7,895 bp of the genome, including a portion of *galK*, were recombined into EcNR2 and EcNR2.dnaG.Q576A. The recombined populations were screened for the GalK- phenotype (white colonies) on MacConkey agar plates supplemented with galactose as a carbon source. EcNR2.dnaG.Q576A significantly outperformed EcNR2 for the 100 bp and 1,149 bp deletions, but there was no difference detected between the two strains for the 7,895 bp deletion.

## Supplementary References

1. Wang, H.H., Isaacs, F.J., Carr, P.A., Sun, Z.Z., Xu, G., Forest, C.R. and Church, G.M. (2009) Programming cells by multiplex genome engineering and accelerated evolution. *Nature*, **460**, 894-898.
2. Tougu, K. and Marians, K.J. (1996) The Interaction between Helicase and Primase Sets the Replication Fork Clock. *Journal of Biological Chemistry*, **271**, 21398-21405.
3. Corn, J.E. and Berger, J.M. (2006) Regulation of bacterial priming and daughter strand synthesis through helicase-primase interactions. *Nucleic Acids Res.*, **34**, 4082-4088.
4. Lia, G., Michel, B. and Allemand, J.-F. (2012) Polymerase Exchange During Okazaki Fragment Synthesis Observed in Living Cells. *Science*, **335**, 328-331.
5. Okazaki, R., Okazaki, T., Sakabe, K., Sugimoto, K. and Sugino, A. (1968) Mechanism of DNA chain growth. I. Possible discontinuity and unusual secondary structure of newly synthesized chains. *Proceedings of the National Academy of Sciences*, **59**, 598-605.
